# Supplementary material for: Blood Neurofilament Levels Predict Cognitive Decline across the Alzheimer’s Disease Continuum
Source: MDPI journal article supplement (doi:10.3390/ijms242417361), 2023-12-11

## Supplementary Table S1

Correlation table between the measured variables at baseline.

|                        |                           | AGE            | BMI           | Creatininemia  | eGFR           | MMSE          | Plasma A $\beta$ 42/40 | Plasma NfL     | CSF A $\beta$ 42/40 |
|------------------------|---------------------------|----------------|---------------|----------------|----------------|---------------|------------------------|----------------|---------------------|
| AGE                    | Correlation Coefficient   |                | 0.058         | 0.066          | -0.399         | -0.064        | -0.026                 | 0.381          | 0.030               |
|                        | Significance Level P<br>n |                | 0.2796<br>344 | 0.2355<br>325  | <0.0001<br>325 | 0.2380<br>337 | 0.6367<br>328          | <0.0001<br>350 | 0.7135<br>156       |
| BMI                    | Correlation Coefficient   | 0.058          |               | 0.208          | -0.166         | 0.033         | 0.112                  | -0.189         | 0.023               |
|                        | Significance Level P<br>n | 0.2796<br>344  |               | 0.0002<br>320  | 0.0029<br>320  | 0.5531<br>333 | 0.0443<br>324          | 0.0004<br>344  | 0.7735<br>156       |
| Creatininemia          | Correlation Coefficient   | 0.066          | 0.208         |                | -0.752         | -0.049        | 0.049                  | 0.182          | -0.008              |
|                        | Significance Level P<br>n | 0.2355<br>325  | 0.0002<br>320 |                | <0.0001<br>325 | 0.3906<br>314 | 0.3963<br>308          | 0.0010<br>325  | 0.9207<br>151       |
| eGFR                   | Correlation Coefficient   | -0.399         | -0.166        | -0.752         |                | 0.077         | -0.061                 | -0.337         | -0.006              |
|                        | Significance Level P<br>n | <0.0001<br>325 | 0.0029<br>320 | <0.0001<br>325 |                | 0.1739<br>314 | 0.2826<br>308          | <0.0001<br>325 | 0.9379<br>151       |
| MMSE                   | Correlation Coefficient   | -0.064         | 0.033         | -0.049         | 0.077          |               | 0.058                  | -0.188         | 0.184               |
|                        | Significance Level P<br>n | 0.2380<br>337  | 0.5531<br>333 | 0.3906<br>314  | 0.1739<br>314  |               | 0.3042<br>318          | 0.0005<br>337  | 0.0236<br>151       |
| Plasma A $\beta$ 42/40 | Correlation Coefficient   | -0.026         | 0.112         | 0.049          | -0.061         | 0.058         |                        | -0.072         | 0.028               |
|                        | Significance Level P<br>n | 0.6367<br>328  | 0.0443<br>324 | 0.3963<br>308  | 0.2826<br>308  | 0.3042<br>318 |                        | 0.1942<br>328  | 0.7333<br>149       |
| Plasma NfL             | Correlation Coefficient   | 0.381          | -0.189        | 0.182          | -0.337         | -0.188        | -0.072                 |                | 0.011               |
|                        | Significance Level P<br>n | <0.0001<br>350 | 0.0004<br>344 | 0.0010<br>325  | <0.0001<br>325 | 0.0005<br>337 | 0.1942<br>328          |                | 0.8915<br>156       |
| CSF A $\beta$ 42/40    | Correlation Coefficient   | 0.030          | 0.023         | -0.008         | -0.006         | 0.184         | 0.028                  | 0.011          |                     |
|                        | Significance Level P<br>n | 0.7135<br>156  | 0.7735<br>156 | 0.9207<br>151  | 0.9379<br>151  | 0.0236<br>151 | 0.7333<br>149          | 0.8915<br>156  |                     |

Spearman rank correlation coefficient: the p-values significance level was adjusted for multiple comparisons to 0.0018

## Supplementary Table S2

Brain structure changes within patients at baseline.

|                                     | AD             | MCI            | p       | MCI             |                             |                 | p     |
|-------------------------------------|----------------|----------------|---------|-----------------|-----------------------------|-----------------|-------|
|                                     |                |                |         | 1st tertile NfL | 2 <sup>nd</sup> tertile NfL | 3rd tertile NfL |       |
| CSF volume (mean $\pm$ SD)          | 0.1972 (0.011) | 0.1929 (0.012) | 0.0003  | 0.1927 (0.011)  | 0.1941 (0.014)              | 0.1916 (0.010)  | NS    |
| White matter volume (mean $\pm$ SD) | 0.3430 (0.013) | 0.3417 (0.012) | NS      | 0.3385 (0.010)  | 0.3426 (0.013)              | 0.3433 (0.011)  | NS    |
| Fazekas scale                       | 1.822 (0.696)  | 1.796 (0.622)  | NS      | 1.544 (0.520)   | 1.956 (0.638)               | 1.830 (0.627)   | 0.002 |
| Grey matter volume (mean $\pm$ SD)  | 0.459 (0.010)  | 0.465 (0.010)  | <0.0001 | 0.4688 (0.009)  | 0.4633 (0.01)               | 0.4652 (0.08)   | 0.01  |
| Hippocampus volume (mean $\pm$ SD)  | 0.0028 (0.001) | 0.0034 (0.001) | <0.0001 | 0.0036 (0.0006) | 0.0034 (0.0008)             | 0.0034 (0.0008) | NS    |
| Scheltens scale                     | 1.920 (0.920)  | 1.522 (0.942)  | 0.0001  | 1.200 (0.862)   | 1.525 (0.907)               | 1.777 (0.981)   | <0.01 |

The P-values significance level was adjusted for multiple comparisons to 0.0083

## Supplementary Table S3

Correlation table between brain structure and plasma NfL at baseline.

| <u>Correlation of plasma NfL</u>       |                           | <u>Entire cohort</u> | AD            | MCI (all)     |
|----------------------------------------|---------------------------|----------------------|---------------|---------------|
| CSF volume (mm <sup>3</sup> )          | Correlation Coefficient   | 0.030                | 0.069         | -0.001        |
|                                        | <u>Significance Level</u> | 0.6042               | 0.4141        | 0.9853        |
|                                        | n                         | 305                  | 143           | 162           |
| White matter volume (mm <sup>3</sup> ) | Correlation Coefficient   | 0.140                | 0.126         | 0.157         |
|                                        | <u>Significance Level</u> | 0.0142               | 0.1329        | 0.0466        |
|                                        | n                         | 305                  | 143           | 162           |
| Fazekas scale                          | Correlation Coefficient   | <b>0.237</b>         | <b>0.325</b>  | 0.151         |
|                                        | <u>Significance Level</u> | <b>&lt;0.0001</b>    | <b>0.0001</b> | 0.0571        |
|                                        | n                         | <b>298</b>           | <b>138</b>    | 160           |
| Grey matter volume (mm <sup>3</sup> )  | Correlation Coefficient   | <b>-0.211</b>        | <b>-0.261</b> | -0.178        |
|                                        | <u>Significance Level</u> | <b>0.0002</b>        | <b>0.0016</b> | 0.0236        |
|                                        | n                         | <b>305</b>           | <b>143</b>    | 162           |
| Hippocampus volume (mm <sup>3</sup> )  | Correlation Coefficient   | -0.090               | -0.031        | -0.109        |
|                                        | <u>Significance Level</u> | 0.1163               | 0.7103        | 0.1655        |
|                                        | n                         | 305                  | 143           | 162           |
| Sheltens scale                         | Correlation Coefficient   | <b>0.249</b>         | <b>0.245</b>  | <b>0.254</b>  |
|                                        | <u>Significance Level</u> | <b>&lt;0.0001</b>    | <b>0.0031</b> | <b>0.0012</b> |
|                                        | n                         | <b>304</b>           | <b>144</b>    | <b>160</b>    |

Spearman rank correlation coefficient

The P-values significance level was adjusted for multiple comparisons to 0.0083

**Supplementary Figure S1: Renal parameters in the three clinical groups according to plasma NfL levels.** Baseline plasma NfL levels of 325 subjects are plotted against eGFR (A) and creatinemia (B) according to AD or MCI status (aMCI and naMCI). Graph shows regression line (blue) with the 95% confidence interval (red).

**A**

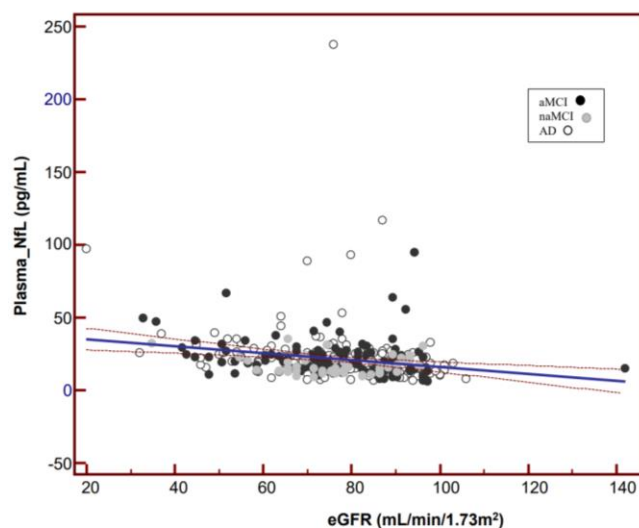

**B**

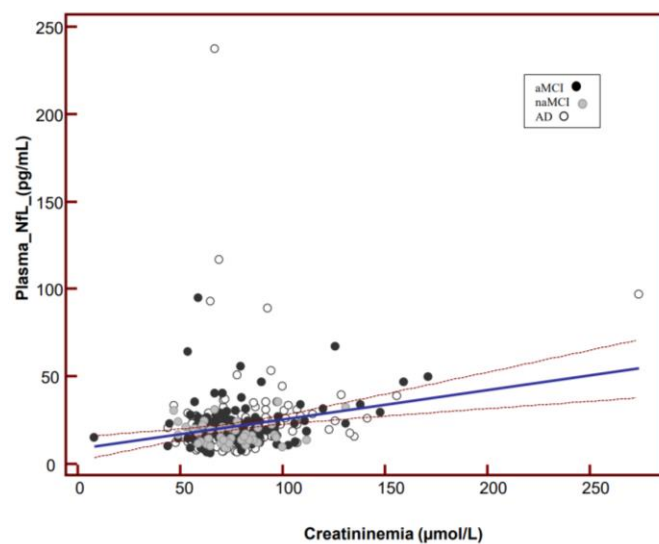

Supplement: s1 [file s1]
